# Supplementary material for: Implementation of an Enhanced Recovery Pathway for Minimally Invasive Pectus Surgery: A Population-Based Cohort Study Evaluating Short- and Long-Term Outcomes Using eHealth Technology
Source: PubMed Central journal article supplement (PMC7709887; doi:10.2196/10996), 2018-10-12
Supplement: periop_v1i2e10996_app3.pdf [file periop_v1i2e10996_app3.pdf]

## Multimedia Appendix 3

The multidisciplinary enhanced recovery pathway—medication components. PCEA, patient-controlled epidural anesthesia; TCA, target controlled anesthesia; PACU, postanesthesia care unit; POD, postoperative day; IV, intravenous; PO, per os; PIB, programmed intermittent bolus regimen.

|                                                                                                                                                                                                                                                                                                                                                                                                                                                                                                                                                                                                                                                                                                                                                                                                                                                                                            |
|--------------------------------------------------------------------------------------------------------------------------------------------------------------------------------------------------------------------------------------------------------------------------------------------------------------------------------------------------------------------------------------------------------------------------------------------------------------------------------------------------------------------------------------------------------------------------------------------------------------------------------------------------------------------------------------------------------------------------------------------------------------------------------------------------------------------------------------------------------------------------------------------|
| <b>Preadmission</b>                                                                                                                                                                                                                                                                                                                                                                                                                                                                                                                                                                                                                                                                                                                                                                                                                                                                        |
| <ul style="list-style-type: none"><li>• Gabapentin, starting 7 days prior to surgery, &lt; 50 kg, daily 300 mg; &gt; 50 kg, daily 900 mg</li><li>• Day before surgery, admission to the floor, where all healthcare providers are familiar with the postoperative protocol</li></ul>                                                                                                                                                                                                                                                                                                                                                                                                                                                                                                                                                                                                       |
| <b>Day of surgery</b>                                                                                                                                                                                                                                                                                                                                                                                                                                                                                                                                                                                                                                                                                                                                                                                                                                                                      |
| <ul style="list-style-type: none"><li>• Multimodal analgesia<ul style="list-style-type: none"><li>• PCEA, optimal placement T8-T10. Ropivacaine bolus 3.75 mgml<sup>-1</sup>, 1 ml per 10 cm above 1 m patient length</li><li>• IV Acetaminophen 20 mgkg<sup>-1</sup>, 15 mgkg<sup>-1</sup> repeated every 6 hours</li><li>• IV Ketorolac 0.5 mgkg<sup>-1</sup></li></ul></li><li>• Multimodal antiemetics<ul style="list-style-type: none"><li>• IV Dexamethasone 5 mg</li><li>• IV Dehydrobenzperidol 0.625 mg</li><li>• IV Ondansetron 4 mg</li><li>• TCA Propofol</li></ul></li><li>• Chest tube and Foley catheter placement</li><li>• When awake: incentive spirometry as frequently as possible</li><li>• PACU admission overnight: continuous pulse oximetry and supplemental oxygen if necessary to maintain saturation</li><li>• Stimulation early intake as tolerated</li></ul> |
| <b>POD 1 - 2</b>                                                                                                                                                                                                                                                                                                                                                                                                                                                                                                                                                                                                                                                                                                                                                                                                                                                                           |
| <ul style="list-style-type: none"><li>• PCEA mixture ropivacaine 0.2 % + fentanyl 10 µgml<sup>-1</sup>, 6 ml/h continuously, 4 ml/h bolus if necessary every 30 minutes (6/4/30) – coadministered with ondansetron 4 mg every 8 hours</li><li>• IV Acetaminophen 15 mgkg<sup>-1</sup> repeated every 6 hours</li><li>• IV Ketorolac 0.5 mgkg<sup>-1</sup> every 8 hours – coadministered with ranitidine 2–4 mg/kg/day</li><li>• Continue gabapentin administration according to preoperative scheme</li><li>• Laxative association</li><li>• Early mobilization (supine position POD 1, sitting and standing position POD 2) and incentive spirometry</li><li>• Remove chest tube POD 1 after thoracic X-ray, remove Foley catheter if PCEA settings have been reduced on POD 2</li></ul>                                                                                                 |
| <b>POD 3</b>                                                                                                                                                                                                                                                                                                                                                                                                                                                                                                                                                                                                                                                                                                                                                                                                                                                                               |
| <ul style="list-style-type: none"><li>• PCEA (ropivacaine 1.6 % + fentanyl 10 µgml<sup>-1</sup>) setting reduction 4/3/10 - coadministered with ondansetron 4 mg every 8 hours</li><li>• Convert to PO acetaminophen and NSAID</li><li>• Continue gabapentin and laxative administration</li><li>• Intensify mobilization (standing position and walking) and incentive spirometry</li><li>• If not already done, remove Foley catheter</li></ul>                                                                                                                                                                                                                                                                                                                                                                                                                                          |
| <b>POD 4</b>                                                                                                                                                                                                                                                                                                                                                                                                                                                                                                                                                                                                                                                                                                                                                                                                                                                                               |
| <ul style="list-style-type: none"><li>• PCEA (ropivacaine 1.6 % + fentanyl 10 µgml<sup>-1</sup>) setting reduction PIB 5/120/3/10</li><li>• Escape buprenorphine 0.2 mg if necessary for breakthrough pain during PCEA weaning</li><li>• Continue PO medication</li><li>• Increasing mobilization and rehabilitation</li></ul>                                                                                                                                                                                                                                                                                                                                                                                                                                                                                                                                                             |
| <b>POD 5</b>                                                                                                                                                                                                                                                                                                                                                                                                                                                                                                                                                                                                                                                                                                                                                                                                                                                                               |
| <ul style="list-style-type: none"><li>• PCEA (ropivacaine 1.6 % + fentanyl 10 µgml<sup>-1</sup>) setting reduction 0/3/10</li><li>• Escape buprenorphine 0.2 mg if necessary for breakthrough pain during PCEA weaning</li><li>• Start tilidine/naloxone slow release 50 mg every 12 hours in preparation for PCEA discontinuation</li><li>• Continue PO medication</li><li>• Evaluates patient for completion of activities of daily living</li></ul>                                                                                                                                                                                                                                                                                                                                                                                                                                     |
| <b>POD 6</b>                                                                                                                                                                                                                                                                                                                                                                                                                                                                                                                                                                                                                                                                                                                                                                                                                                                                               |
| <ul style="list-style-type: none"><li>• If not already done, discontinue PCEA and ondansetron administration</li><li>• Stop NSAID and coadministration of ranitidine</li><li>• Discharge patient when<ul style="list-style-type: none"><li>• pain is well controlled on PO medication,</li><li>• given education on medication reduction scheme and long-term eHealth follow-up,</li><li>• emphasize physical activity exercises and precautions preventing implanted material dislocation</li></ul></li></ul>                                                                                                                                                                                                                                                                                                                                                                             |
