# Supplementary material for: Implementation of an Enhanced Recovery Pathway for Minimally Invasive Pectus Surgery: A Population-Based Cohort Study Evaluating Short- and Long-Term Outcomes Using eHealth Technology
Source: PubMed Central journal article supplement (PMC7709887; doi:10.2196/10996), 2018-10-12
Supplement: periop_v1i2e10996_app4.pdf [file periop_v1i2e10996_app4.pdf]

## Multimedia Appendix 2

### Standard medication reduction scheme, recommended after hospital discharge

NSAID: non-steroidal anti-inflammatory drug. All drugs are administered taking into account the weight of the patient.

#### **Hospital discharge**

- Stop NSAID and coadministered ranitidine

#### **After 7 days**

- Reduce tilidine/naloxone slow release 50 mg two times a day to one a day regimen, earlier reduction is recommended if excessively sleepy.
- Continue acetaminophen

#### **After 12 days**

- Reduce gabapentin from three times a day, to twice a day
- Continue acetaminophen

#### **After 13 days**

- Reduce gabapentin from two times a day, to once a day
- Continue acetaminophen

#### **After 14 days**

- Stop tilidine/naloxone
- Stop gabapentin
- Acetaminophen can be administered if necessary
